# Supplementary material for: QTL-seq analysis identifies two genomic regions determining the heading date of foxtail millet, Setaria italica (L.) P.Beauv
Source: PubMed Central journal article supplement — Breed Sci. 2017 Nov 23;67(5):518–27. doi: 10.1270/jsbbs.17061 (PMC5790050; doi:10.1270/jsbbs.17061), 2017-11-23
Supplement: 67_17061_2.pdf [file 67_17061_2.pdf]

**Supplemental Table 1** Summary of Illumina NextSeq sequencing and alignment data of bulked Y-bulk, S-bulk and L-bulk\*

| Sample | Number of bulked individuals | Total read number <sup>a</sup> | Total read data (Gb) | Aligned percent(%) <sup>b</sup> | Average depth <sup>c</sup> | Accession number in DDBJ |
|--------|------------------------------|--------------------------------|----------------------|---------------------------------|----------------------------|--------------------------|
| Y-bulk | 22                           | 67,352,430                     | 5.05                 | 96.74                           | 7.76                       | DRR089343                |
| S-bulk | 32                           | 90,010,280                     | 6.75                 | 91.25                           | 6.39                       | DRR089342                |
| L-bulk | 33                           | 65,973,982                     | 4.95                 | 96.99                           | 10.06                      | DRR089341                |

\*Sequence reads of each sample were aligned to the Yuikogane consensus sequence

<sup>a</sup> The short reads in which more than 20% of sequenced nucleotide exhibited a phred quality score of < 20 were excluded from the analysis

<sup>b</sup> Percentage of total genomic region of Yuikogane reference sequence aligned by shot reads.

<sup>c</sup> Average of read depth in the whole genome.

**Supplemental Table 2** Characterization of 24 genetic markers developed by this study

| Name     | Left primer (5'-3')     | Right primer (5'-3')     | Chr_Positions (bp) | Restriction enzyme |
|----------|-------------------------|--------------------------|--------------------|--------------------|
| Indel2_1 | CTGGGGGAAGTGAAACAG      | CTCGCACTGTCGCCATCT       | Chr.2_36322253     |                    |
| CAPS2_1  | TGGAAAGAGTGGCTTGCTCT    | TCCCAACTTGAACACTCT       | Chr.2_36976261     | Dde I              |
| Indel2_2 | CGCAAAGGGGACGGTAAATC    | TGCCAGCACAGTAATTTGGC     | Chr.2_37731894     |                    |
| Indel2_3 | AGGTGATGAAATTCAAAGATGCA | CTGTGGCGGGGAACATAAGT     | Chr.2_38480665     |                    |
| Indel2_4 | TTCACAAATACAAACGAAACGCT | AGTTGCGCACACACTTTCTC     | Chr.2_39712914     |                    |
| Indel2_5 | AAGTCATCGTCTTGCTTGCT    | ACTTGCATCAGCTAGCTTCC     | Chr.2_40076876     |                    |
| CAPS2_2  | TCGAGGCATCGATATCCTTT    | CAGAGGTGCGTGTAGATGC      | Chr.2_40407154     | BamH I             |
| CAPS2_3  | GCGTGCTGATGATTGAATTG    | TTCAGACGTTGCTTTGCTTG     | Chr.2_41193277     | Hae III            |
| Indel2_6 | CTGCTGTTTCATGCTCTTGCT   | TTTACGCAATGCGGCTAAAT     | Chr.2_41825982     |                    |
| Indel3_1 | ATCTCACCTCCCTCTTCATCC   | AACCGCTCCTCTCACTCTCA     | Chr.3_46556440     |                    |
| Indel3_2 | AGCCTGAACTCGTTCCAAAA    | TGCTGAAACTGAAAAATTTGGA   | Chr.3_47386968     |                    |
| Indel3_3 | GCGATCCGAATACCCCTGTA    | TAGGGAGGATGGTTGGAACG     | Chr.3_48548835     |                    |
| Indel3_4 | GACCTATATCGTGTCCGCCC    | CCGTAGTGTGGGCTAAAGAAG    | Chr.3_48831423     |                    |
| Indel3_5 | CCTGCGTTAGAGGCAAACCTC   | CTTTTGGCGAGGCATACATA     | Chr.3_50549891     |                    |
| Indel7_1 | ATAGGGCACGTTTGGACAGA    | CTGCGCAGTTCATTTTCG       | Chr.7_28590261     |                    |
| Indel7_2 | ATATAGCGAGGGCCGAGAGA    | CCGTGTGAAAGCCGAAC        | Chr.7_29204015     |                    |
| CAPS7_1  | TGTTCTTCCCAGAACATTGCT   | TCATGTGCAGCAAACAATGA     | Chr.7_29599705     | Taq I              |
| CAPS7_2  | GTTTGCTTGTGCCAGAGCTT    | GCCAGCAAAAGAAGTTCAGG     | Chr.7_29886373     | Xsp I              |
| Indel7_3 | TGTCACTGCCAGTACCAGACA   | AAAGGAGAGTGGGTTTGGTG     | Chr.7_30158868     |                    |
| CAPS7_3  | GCAGTGTCCCGCTATACAT     | TGGTTTCCTTATTGACATCTCTTG | Chr.7_30419207     | Taq I              |
| Indel7_4 | CCCCAATTTCTTCGCTGGTT    | TTGGTGAGCGAGGAAGAGAG     | Chr.7_30522602     |                    |
| CAPS7_4  | CTGCGTCGCGTGAATATC      | TACTGCGGGTACTTGTGTGC     | Chr.7_30709835     | Bcn I              |
| CAPS7_5  | TCTCCTCCGTGAGGTAACCA    | CTGCACACGAGAGGTTTGAA     | Chr.7_31055253     | BciI130 I          |
| CAPS7_6  | TGTTCTCGTTCCTTGTTCC     | CGTGCAACAGCCTCTGCT       | Chr.7_31563393     | Dde I              |
